# Supplementary material for: Optimization and Development of Albumin–Biopolymer Bioconjugates with Solubility-Improving Properties
Source: MDPI journal article supplement (doi:10.3390/biomedicines9070737), 2021-06-26
Supplement: s1 [file s1]

Supplementary Materials

Table S1. Process parameters of freeze drying.

| Time (Hours) | Temperature (°C) |
|--------------|------------------|
| 0–4          | –40              |
| 1            | 15               |
| 1            | 20               |
| 8            | 30               |
| 6            | 40               |
